# Supplementary material
Source: PubMed Central journal article supplement (PMC7048374)
Supplement: NIHMS1537847-supplement-Supplementary_material.pdf [file NIHMS1537847-supplement-Supplementary_material.pdf]

## **SUPPLEMENTARY DATA**

### **Supplementary Materials and Methods**

#### **Plasma Cholesterol and Triglyceride Levels**

Plasma was collected from *ApoE*<sup>-/-</sup> and *Aif1*<sup>-/-</sup>;*ApoE*<sup>-/-</sup> mice after 18 weeks of high fat diet feeding and overnight fasting. Total cholesterol and triglycerides were measured by commercially available colorimetric kits (FUJIFILM Wako Diagnostics; 999-02601 and Thermo Scientific; TR22421).

#### **BrdU Incorporation**

BMDMs were incubated with BrdU (10 μM) for 15 hours at specified days after bone marrow retrieval. Cellular DNA was denatured with HCl and stained with anti-BrdU antibody (Abcam; ab8152; 1:200 dilution). BrdU incorporation was assessed by FACS analysis using a FACSCalibur flow cytometer (BD Biosciences).

#### **Propidium Iodide Staining**

For cell cycle analysis, BMDMs at days 3, 6, 8 and 10 days of culture were washed with FACS buffer (10% FBS in PBS) fixed with 95% ethanol and stained with propidium iodide (2 ug/ml) in PBS containing 0.1 mg/ml RNase.

#### **OxLDL Overload**

To evaluate the effect of oxidized (ox)-LDL overload on the viability of wt and *Aif1*<sup>-/-</sup> BMDMs, 16x10<sup>3</sup> cells/well were plated in 96-well plates with six independent wells per treatment and genotype. BMDMs were incubated with 300 μg/ml of oxLDL (Kalen Biomedical; 7702026) for 24 or 48 hours. Evaluation of cell viability in culture was performed with the AlamarBlue assay (Bio-Rad; BUF012A). Absorbances at 570 nm and 600 nm were measured on a Synergy 2 microplate reader (BioTek). AlamarBlue reduction correlates with the number of viable cells, and was calculated according to the manufacturer's instructions and expressed relative to baseline.

#### **OxLDL Uptake**

BMDMs were cultured on glass bottom 6-well culture dishes (Corning; 3516). After overnight incubation with 0, 25, or 50 µg/ml of oxLDL (Kalen Biomedical; 7702026), cells were washed, fixed with 10% formalin and stained with Oil Red O for 18 minutes. After washing and drying, cells were observed under the microscope. Cells with at least 5 lipid granules were counted as positive. The number of positive BMDMs per total BMDMs in a given field were counted from least 15 random fields.

### **Expression of Lipid Uptake and Cholesterol Efflux Genes**

Wt and *Aif1*<sup>-/-</sup> BMDMs were stimulated overnight with 50 µg/ml of oxLDL (Kalen Biomedical; 7702026). Total RNA was isolated as described in the main manuscript, cDNA was synthesized using the SuperScript III First-Strand Synthesis System (Invitrogen; 18080051) and the expression levels of *Sr-a1* (forward, 5'-GGAGTGTAGGCGGATC-3'; reverse, 5'-GTCAATGGAGGCCCA-3'), *CD36* (forward, 5'-TCCTCTGACATTTGCAGGTCTATC-3'; reverse, 5'-AAAGGCATTGGCTGGAAGAA-3'), *Abca1* (forward, 5'-CCGAGGAAGACGTGGACACCTTC-3'; reverse, 5'-CCTCAGCCATGACCTGCCTTGTAG-3') and *Abcg1* (forward, 5'-CCTTCCTCAGCATCATGCG-3'; reverse, 5'-CCGATCCCAATGTGCGA-3'), relative to the housekeeping *18S* (forward, 5'-AGTCCCTGCCCTTTGTACACA-3'; reverse, 5'-CGATCCGAGGGCCTCACTA-3') and normalized to unstimulated cells, were measured by real-time PCR using the PowerUp SYBR Green Master Mix (ThermoFisher; A25741) following manufacturer recommendations. Gene expression changes were calculated using the  $\Delta\Delta CT$  method as described in the main manuscript.

### **Cytokine Levels**

Wt and *Aif1*<sup>-/-</sup> BMDMs were stimulated overnight with 50 µg/ml of oxLDL (Kalen Biomedical; 7702026). Cell culture supernatants were collected and IL-6 and TNF- $\alpha$  pro-inflammatory cytokine levels were determined using the ELISA MAX™ Deluxe Sets for mouse IL-6 (Biolegend; 431304) and mouse TNF- $\alpha$

(Biolegend; 430904) following manufacturer's recommendations. Secreted IL-6 and TNF- $\alpha$  levels were calculated after oxLDL stimulation, relative to baseline.

### **Supplementary Figures and Tables**

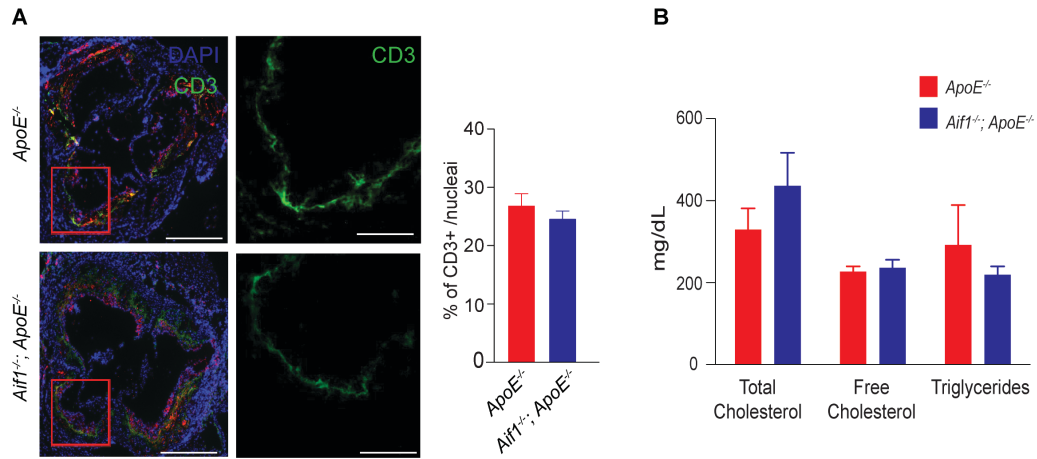

**Supplementary Figure S1.** A) No differences in CD3<sup>+</sup> T-cell content between plaques from *ApoE*<sup>-/-</sup> (n=3) and *Aif1*<sup>-/-</sup>; *ApoE*<sup>-/-</sup> (n=3) mice; quantification on the left. B) Cholesterol and triglyceride levels are similar between *ApoE*<sup>-/-</sup> (n=11) and *Aif1*<sup>-/-</sup>; *ApoE*<sup>-/-</sup> (n=11) mice placed on high fat diet for 18 weeks. Error bars indicate  $\pm$  SEM.

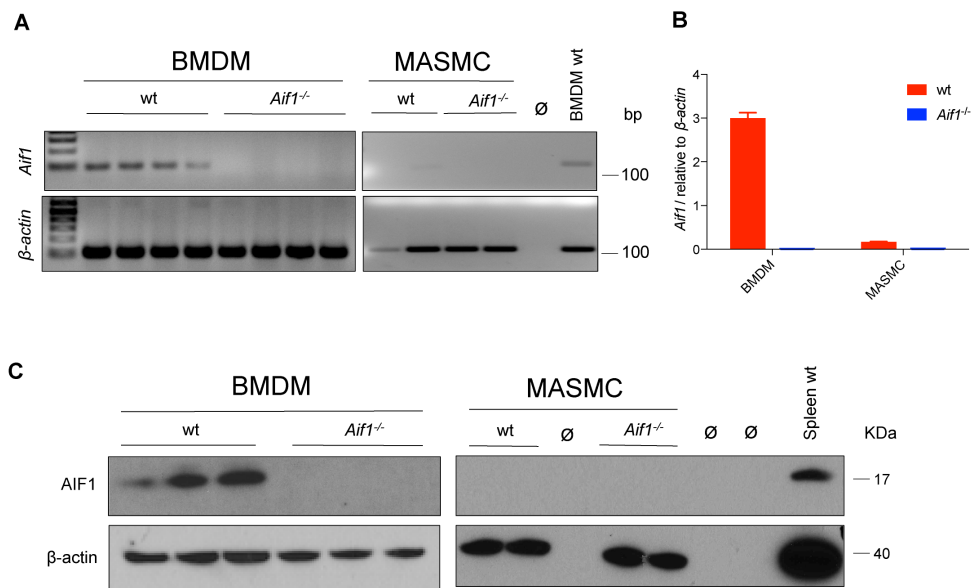

**Supplementary Figure S2.** Physiologic AIF1 levels were detected in BMDMs but not in MASCs. AIF1 levels were measured in BMDMs and MASCs using A) end-point PCR, B) real-time PCR and C) western blot. Error bars indicate  $\pm$  SEM.

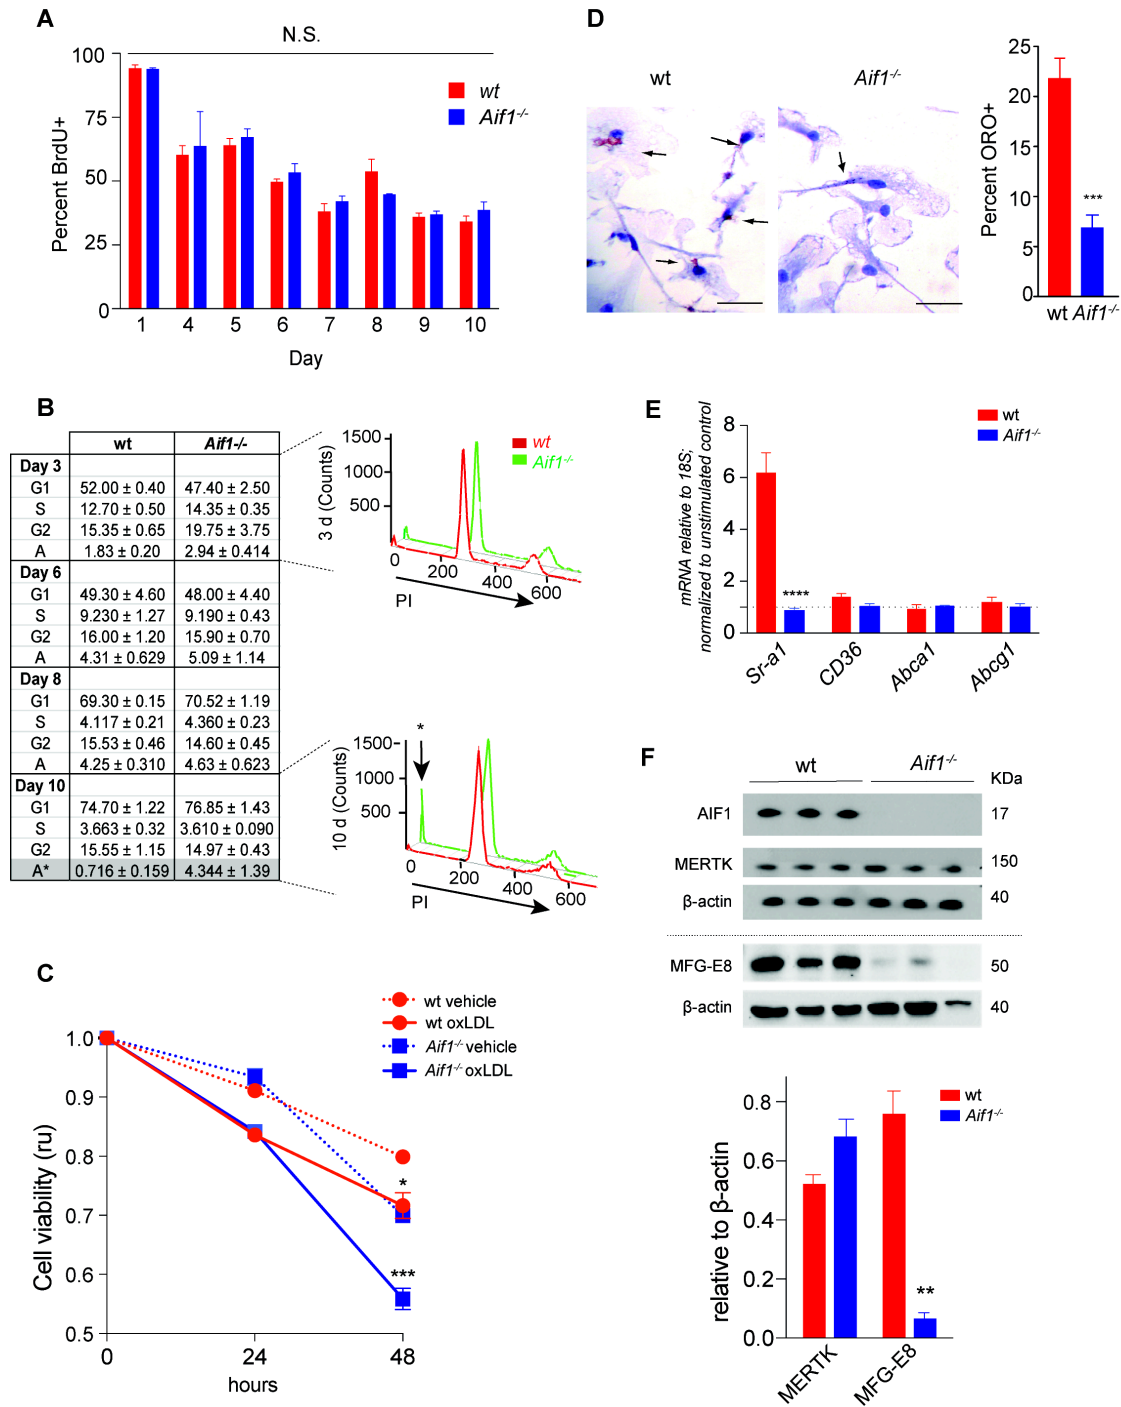

**Supplementary Figure S3.** AIF1 limits apoptosis, promotes survival and supports oxLDL uptake and efferocytosis in macrophages. (A) BrdU incorporation was assessed by FACS analysis in Wt and *Aif1*<sup>-/-</sup> BMDMs. (B) Propidium Iodide (PI) analysis of the cell cycle of BMDMs at days 3, 6, 8 and 10. Cells in the G1, S, G2 and A phases of the cell cycle are shown as a

percentage of total cells in each gate ( $\pm$ SD). PI analysis of cell cycle at days 3 and 10 is zoomed; arrowhead indicates apoptotic cells at day 10 (with  $<2N$  DNA). (C) Wt and *Aif1*<sup>-/-</sup> BMDMs were stimulated with oxLDL (300  $\mu$ g/ml) for 24 and 48 hours and cell viability was assessed using AlamarBlue assay. (D) Left; bright field image showing BMDMs cultured with oxLDL (50  $\mu$ g/ml) overnight and stained with ORO (bar, 20  $\mu$ M). Right; BMDMs with at least five intracellular lipid granules were counted as ORO positive. Percentage of ORO positive BMDMs per total macrophages per field were quantified from at least 15 random fields. (E) Wt and *Aif1*<sup>-/-</sup> BMDMs were stimulated with oxLDL (50  $\mu$ g/ml) for 12 hours and expression changes of lipid uptake (*Sr-a1*, *CD36*) and lipid efflux (*Abca1* and *Abcg1*) genes were measured by real time qPCR, relative to *18S*. Dashed grey line represents no changes after stimulation. (F) Lysates from wt and *Aif1*<sup>-/-</sup> BMDMs were immunoblotted for MERTK and MFG-E8 markers of efferocytosis and quantified relative to  $\beta$ -actin levels. Dashed grey line represents distinct gels. Error bars indicate  $\pm$  SEM (N.S. non-significant, \*  $p < 0.05$ , \*\*  $p < 0.001$ , \*\*\*  $p < 0.0001$ , \*\*\*\*  $p < 0.00001$ ).

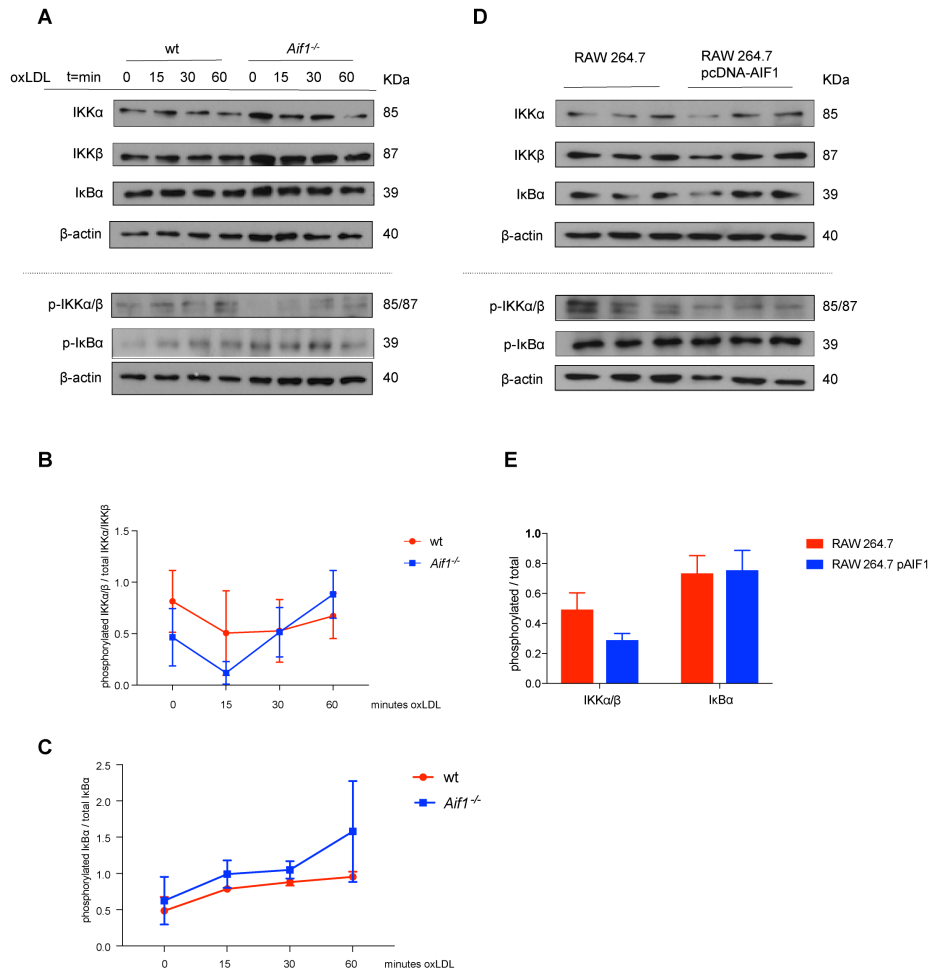

**Supplementary Figure S4.** AIF1 does not affect the levels of phosphorylated IKKα/β, and phosphorylated IκBα. (A) Wt and *Aif1*<sup>-/-</sup> BMDMs were stimulated with oxLDL (50 μg/ml) for 15, 30 and 60 minutes. Lysates were immunoblotted for total and phosphorylated IKKα, IKKβ and IκBα. (B) Quantification of phosphorylated IKKα/β protein levels, relative to total IKKα/IKKβ levels. (C) Quantification of phosphorylated IκBα protein levels, relative to total IκBα levels. (D) RAW 264.7 cells were transfected with 2 μg/ml of pcDNA3.1-AIF1 or control pcDNA3.1. 48 hours after transfection lysates were immunoblotted for total and phosphorylated IKKα, IKKβ and IκBα. (E) Quantification of phosphorylated IKKα/β and IκBα protein levels, relative to total IKKα/IKKβ and IκBα levels, respectively. Dashed grey line represents distinct gels. Error bars indicate ± SEM.



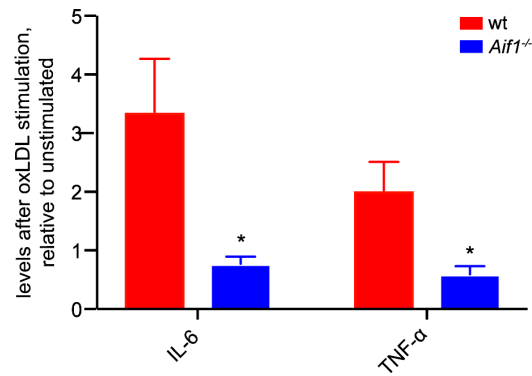

**Supplementary Figure S5.** AIF1 promotes pro-inflammatory cytokine production after oxLDL stimulation. Wt and *Aif1*<sup>-/-</sup> BMDMs were stimulated overnight with 50 µg/ml of oxLDL. IL-6 and TNF-α levels were determined after oxLDL stimulation in cell culture supernatants, relative to baseline. Error bars indicate ± SEM (\*  $p < 0.05$ ).

Supplementary Table S1

| Position | Gene     | Up/Down Regulation (comparing to unstimulated) |                 | Up/Down Regulation (comparing to unstimulated)                      |                 |
|----------|----------|------------------------------------------------|-----------------|---------------------------------------------------------------------|-----------------|
|          |          | wt BMMP 6 hours oxLDL vs. wt BMMP              |                 | Aif1 <sup>-/-</sup> BMMP 6 hours oxLDL vs. Aif1 <sup>-/-</sup> BMMP |                 |
|          |          | Fold Change                                    | p-value         | Fold Change                                                         | p-value         |
| A01      | Adm      | 1.2787                                         | 0.666825        | -1.1045                                                             | 0.60447         |
| A02      | Agt      | -1.0154                                        | 0.956727        | -1.2002                                                             | 0.295387        |
| A03      | Akt1     | 1.4287                                         | 0.054574        | -1.2483                                                             | 0.364301        |
| A04      | Aldh3a2  | 1.2014                                         | 0.119041        | -1.2311                                                             | 0.282142        |
| A05      | Bcl2a1a  | -1.161                                         | 0.038915        | -1.1147                                                             | 0.26693         |
| A06      | Bcl2l1   | 1.3177                                         | 0.017852        | <b>-1.6192</b>                                                      | <b>0.025318</b> |
| A07      | Birc2    | 1.1303                                         | 0.123071        | -1.2397                                                             | 0.275587        |
| A08      | Birc3    | 1.0314                                         | 0.490646        | -1.0892                                                             | 0.495549        |
| A09      | C3       | 1.2097                                         | 0.246245        | -1.3724                                                             | 0.217192        |
| A10      | C4a      | <b>-2.0167</b>                                 | 0.300802        | 1.2426                                                              | 0.998305        |
| A11      | Ccl12    | <b>-1.697</b>                                  | 0.155011        | <b>-2.114</b>                                                       | <b>0.017154</b> |
| A12      | Ccl22    | <b>2.0392</b>                                  | 0.412561        | -1.4914                                                             | 0.310159        |
| B01      | Ccl5     | -1.0757                                        | 0.377704        | -1.0377                                                             | 0.42768         |
| B02      | Ccnd1    | -1.3213                                        | 0.000835        | <b>-3.4581</b>                                                      | <b>0.001979</b> |
| B03      | Ccr5     | 1.2409                                         | 0.741537        | <b>-1.9408</b>                                                      | 0.138803        |
| B04      | Cd40     | -1.2912                                        | 0.092076        | -1.4241                                                             | 0.251636        |
| B05      | Cd74     | 1.0314                                         | 0.679001        | -1.0644                                                             | 0.650905        |
| B06      | Cd80     | 1.2611                                         | 0.092006        | 1.0377                                                              | 0.744013        |
| B07      | Cd83     | 1.0009                                         | 0.952161        | -1.8911                                                             | <b>0.011391</b> |
| B08      | Cdkn1a   | 1.4621                                         | 0.031154        | 1.1303                                                              | 0.530253        |
| B09      | Cfb      | 1.2266                                         | 0.511959        | -1.2628                                                             | 0.550072        |
| B10      | Csf1     | -1.0415                                        | 0.825125        | -1.2628                                                             | 0.398404        |
| B11      | Csf2     | <b>2.1856</b>                                  | 0.070538        | -1.1019                                                             | 0.831685        |
| B12      | Csf2rb   | 1.2817                                         | 0.064332        | -1.257                                                              | 0.266444        |
| C01      | Csf3     | <b>-1.8176</b>                                 | 0.256882        | <b>2.1189</b>                                                       | 0.170956        |
| C02      | Cxcl1    | -1.0154                                        | 0.956727        | -1.0163                                                             | 0.973367        |
| C03      | Cxcl10   | <b>-1.7475</b>                                 | <b>0.030865</b> | <b>-3.249</b>                                                       | <b>0.008424</b> |
| C04      | Cxcl3    | 1.0629                                         | 0.572313        | 1.4273                                                              | 0.409928        |
| C05      | Cxcl9    | -1.0154                                        | 0.956727        | -1.0093                                                             | 0.803167        |
| C06      | Egfr     | 1.1287                                         | 0.361254        | 1.3915                                                              | 0.391606        |
| C07      | Egr2     | 1.0314                                         | 0.829691        | -1.181                                                              | 0.502372        |
| C08      | F3       | 1.058                                          | 0.815974        | 1.0425                                                              | 0.860726        |
| C09      | F8       | 1.4621                                         | 0.318969        | -1.3074                                                             | 0.409326        |
| C10      | Fas      | 1.2669                                         | 0.045033        | 1.1892                                                              | 0.349834        |
| C11      | Fasl     | -1.3183                                        | 0.165145        | <b>2.1238</b>                                                       | 0.119904        |
| C12      | Gadd45b  | <b>-1.5641</b>                                 | <b>0.029601</b> | <b>-1.7092</b>                                                      | <b>0.033519</b> |
| D01      | Icam1    | 1.2876                                         | 0.268238        | <b>-1.5227</b>                                                      | 0.133656        |
| D02      | Ifnb1    | <b>-2.3598</b>                                 | <b>0.020021</b> | -1.3195                                                             | 0.755823        |
| D03      | Ifnγ     | -1.0154                                        | 0.956727        | -1.0093                                                             | 0.803167        |
| D04      | Il12b    | -1.0154                                        | 0.956727        | -1.0093                                                             | 0.803167        |
| D05      | Il15     | 1.0629                                         | 0.440404        | -1.1567                                                             | 0.303168        |
| D06      | Il1a     | <b>5.3939</b>                                  | <b>0.041189</b> | -1.0116                                                             | 0.737412        |
| D07      | Il1b     | <b>2.5223</b>                                  | 0.06027         | <b>1.8656</b>                                                       | <b>0.028327</b> |
| D08      | Il1r2    | <b>1.9159</b>                                  | 0.346039        | <b>2.2501</b>                                                       | 0.095035        |
| D09      | Il1rn    | 1.3299                                         | 0.013437        | -1.0521                                                             | 0.714705        |
| D10      | Il2      | -1.0154                                        | 0.956727        | -1.0093                                                             | 0.803167        |
| D11      | Il2ra    | -1.0154                                        | 0.956727        | -1.0093                                                             | 0.803167        |
| D12      | Il4      | -1.2558                                        | 0.931504        | <b>2.4396</b>                                                       | 0.195641        |
| E01      | Il6      | <b>3.4614</b>                                  | 0.067785        | <b>-3.0596</b>                                                      | 0.127271        |
| E02      | Ins2     | -1.0154                                        | 0.956727        | -1.0093                                                             | 0.803167        |
| E03      | Irf1     | 1.0386                                         | 0.703487        | -1.4811                                                             | 0.09248         |
| E04      | Lta      | 1.2069                                         | 0.341604        | -1.014                                                              | 0.6944          |
| E05      | Ltb      | <b>2.2212</b>                                  | 0.110478        | <b>2.2553</b>                                                       | 0.169958        |
| E06      | Map2k6   | <b>-1.8659</b>                                 | <b>0.020742</b> | <b>-2.2501</b>                                                      | <b>0.020008</b> |
| E07      | Mif      | 1.2995                                         | 0.022084        | -1.0943                                                             | 0.4794          |
| E08      | Mmp9     | 1.1903                                         | 0.492971        | -1.3597                                                             | 0.092715        |
| E09      | Myc      | 1.2817                                         | 0.176796        | 1.192                                                               | 0.266034        |
| E10      | Myd88    | 1.4025                                         | 0.070328        | -1.4273                                                             | 0.195098        |
| E11      | Ncoa3    | -1.0658                                        | 0.472457        | -1.4811                                                             | 0.085786        |
| E12      | Nfkb1    | 1.1055                                         | 0.214216        | -1.3074                                                             | 0.210545        |
| F01      | Nfkb2    | 1.3768                                         | 0.110465        | -1.0792                                                             | 0.692771        |
| F02      | Nfkbia   | -1.1214                                        | 0.391476        | -1.3472                                                             | 0.054173        |
| F03      | Nqo1     | <b>2.4083</b>                                  | <b>0.000074</b> | <b>1.9816</b>                                                       | <b>0.019207</b> |
| F04      | Nr4a2    | <b>2.2679</b>                                  | <b>0.02167</b>  | 1.1567                                                              | 0.468858        |
| F05      | Pdgfr    | <b>1.6714</b>                                  | 0.738347        | <b>-2.5374</b>                                                      | <b>0.023506</b> |
| F06      | Plau     | 1.0056                                         | 0.929428        | <b>-2.9485</b>                                                      | <b>0.048977</b> |
| F07      | Pls2     | <b>2.3972</b>                                  | <b>0.012825</b> | 1.4983                                                              | 0.01197         |
| F08      | Rel      | -1.0958                                        | 0.048679        | -1.3819                                                             | 0.032325        |
| F09      | Rela     | <b>1.5706</b>                                  | 0.099503        | -1.3629                                                             | 0.299764        |
| F10      | Relb     | <b>1.8678</b>                                  | 0.089362        | -1.2483                                                             | 0.346681        |
| F11      | Sele     | 1.452                                          | 0.353984        | -1.0093                                                             | 0.803167        |
| F12      | Selp     | 1.4553                                         | 0.467806        | -1.0093                                                             | 0.803167        |
| G01      | Snap25   | -1.3648                                        | 0.180549        | 1.398                                                               | 0.380579        |
| G02      | Sod2     | -1.0107                                        | 0.921709        | 1.0595                                                              | 0.669863        |
| G03      | Stat1    | -1.0807                                        | 0.35352         | <b>-1.617</b>                                                       | <b>0.026262</b> |
| G04      | Stat3    | 1.3864                                         | 0.023655        | -1.1329                                                             | 0.637861        |
| G05      | Stat5b   | 1.1157                                         | 0.597123        | -1.3287                                                             | 0.25978         |
| G06      | Tnf      | -1.1009                                        | 0.809463        | <b>-1.6596</b>                                                      | 0.088411        |
| G07      | Tnfrsf1b | <b>1.6111</b>                                  | <b>0.008289</b> | -1.0943                                                             | 0.732519        |
| G08      | Tnfrsf10 | 1.0654                                         | 0.743247        | <b>-2.3134</b>                                                      | 0.22424         |
| G09      | Traf2    | 1.3864                                         | 0.06299         | -1.1947                                                             | 0.438716        |
| G10      | Trp53    | 1.058                                          | 0.431247        | -1.1225                                                             | 0.306121        |
| G11      | Vcam1    | -1.0154                                        | 0.956727        | -1.0093                                                             | 0.803167        |
| G12      | Xiap     | 1.1339                                         | 0.526546        | -1.1434                                                             | 0.395783        |

**Supplementary Table S1.** Wt and *Aif1*<sup>-/-</sup> BMDM fold change expression of NF- $\kappa$ B signaling target genes after oxLDL stimulation (relative to unstimulated cells). Cells were stimulated for 6 hours with oxLDL (50  $\mu$ g/ml). Gene expression changes were assessed using the NF- $\kappa$ B - signaling target gene array and calculated using the  $\Delta\Delta$ CT method. Upregulated gene expression changes (fold change > 1.5) are depicted in red and downregulated gene expression changes (fold change < -1.5) are depicted in green. Statistically significant expression changes ( $p < 0.05$ ) are depicted in blue. Genes are organized alphabetically.
